# Supplementary material
Source: PubMed Central journal article supplement (PMC4538558)
Supplement: AAC.00978-15_zac009154301so1.pdf [file AAC.00978-15_zac009154301so1.pdf]

TABLE S1 MICs and MECs obtained for individual *Microascus* and *Scopulariopsis* strains tested

| Species                          | CBS number | Strain origin                                                         | MIC ( $\mu\text{g/ml}$ ) |     |     |     |     |     |     |     |     |     | MEC ( $\mu\text{g/ml}$ ) |
|----------------------------------|------------|-----------------------------------------------------------------------|--------------------------|-----|-----|-----|-----|-----|-----|-----|-----|-----|--------------------------|
|                                  |            |                                                                       | AMB                      | CPX | TRB | 5FC | FLC | ITC | KTC | MCZ | POS | VRC | CFG                      |
| <i>Microascus albonigrescens</i> | CBS 313.71 | decaying wood                                                         | 8                        | >16 | 0.5 | >64 | >64 | >16 | 0.5 | 1   | >16 | 8   | 8                        |
| <i>Microascus albonigrescens</i> | CBS 109.69 | litter treated with urea                                              | -                        | >16 | 0.5 | >64 | >64 | >16 | -   | >16 | >16 | >16 | 0.5                      |
| <i>Microascus caviariformis</i>  | CBS 536.87 | decaying meat                                                         | 1                        | >16 | 2   | >64 | >64 | >16 | 0.5 | 4   | >16 | 16  | 0.25                     |
| <i>Microascus cinereus</i>       | CBS 664.71 | lung, man                                                             | >16                      | 16  | 1   | >64 | >64 | >16 | -   | 16  | >16 | >16 | 1                        |
| <i>Microascus cinereus</i>       | CBS 195.61 | soil                                                                  | >16                      | >16 | 2   | >64 | >64 | >16 | -   | 4   | >16 | 16  | 1                        |
| <i>Microascus cinereus cf.</i>   | CBS 116059 | polyethylene with starch, subjected to 3-year soil environment effect | >16                      | >16 | 2   | >64 | >64 | >16 | 16  | >16 | >16 | >16 | 8                        |
| <i>Microascus cirrosus</i>       | CBS 277.34 | root                                                                  | >16                      | >16 | 1   | >64 | >64 | >16 | 8   | >16 | >16 | 16  | 1                        |

|                                |            |                               |     |     |      |     |     |     |     |     |     |     |     |
|--------------------------------|------------|-------------------------------|-----|-----|------|-----|-----|-----|-----|-----|-----|-----|-----|
| <i>Microascus cirrosus</i>     | CBS 116405 | antique tapestries            | >16 | >16 | 1    | >64 | >64 | >16 | 4   | >16 | >16 | 16  | 1   |
| <i>Microascus cirrosus</i>     | CBS 462.97 | onychomycosis                 | 16  | 8   | -    | >64 | >64 | >16 | 0.5 | 2   | -   | 2   | -   |
| <i>Microascus longirostris</i> | CBS 267.49 | skin, <i>Sciurus vulgaris</i> | >16 | >16 | 1    | >64 | >64 | >16 | 1   | >16 | >16 | 8   | 1   |
| <i>Microascus longirostris</i> | CBS 415.64 | soil                          | 2   | -   | 0.5  | >64 | >64 | >16 | 0.5 | 16  | >16 | >16 | 1   |
| <i>Microascus longirostris</i> | CBS 196.61 | wasp's nest                   | 2   | 4   | -    | >64 | >64 | >16 | 2   | >16 | >16 | 16  | 0.5 |
| <i>Microascus manginii</i>     | CBS 399.34 | diseased skin, man            | 16  | >16 | 1    | >64 | >64 | >16 | 4   | >16 | >16 | >16 | 16  |
| <i>Microascus manginii</i>     | CBS 285.64 | soil                          | >16 | >16 | 0.25 | >64 | >64 | >16 | 4   | >16 | >16 | >16 | 2   |
| <i>Microascus manginii</i>     | CBS 132.78 | dentine, man                  | 16  | >16 | 4    | >64 | >64 | >16 | 8   | >16 | >16 | >16 | 0.5 |
| <i>Microascus manginii</i>     | CBS 506.66 | chicken litter                | -   | >16 | 0.5  | >64 | >64 | >16 | -   | >16 | >16 | 16  | 1   |
| <i>Microascus nidicola</i>     | CBS 103.85 | tinea plantaris, man          | 4   | 1   | 1    | >64 | >64 | 8   | 0.5 | -   | >16 | 4   | -   |
| <i>Microascus pyramidus</i>    | CBS 668.71 | hair, pocket mouse            | -   | >16 | 8    | >64 | >64 | >16 | -   | 16  | >16 | 4   | 1   |

|                                                           |            |                                                |     |     |     |     |     |     |      |     |     |     |       |
|-----------------------------------------------------------|------------|------------------------------------------------|-----|-----|-----|-----|-----|-----|------|-----|-----|-----|-------|
| <i>Microascus senegalensis</i>                            | CBS 594.78 | skin, man                                      | >16 | >16 | 1   | >64 | >64 | >16 | 4    | >16 | >16 | >16 | 8     |
| <i>Microascus senegalensis</i>                            | CBS 277.74 | soil                                           | 16  | >16 | >16 | >64 | >64 | >16 | 1    | 16  | 0.5 | 8   | 8     |
| <i>Microascus trigonosporus</i> var. <i>macrosporus</i>   | CBS 662.71 | soil                                           | 2   | 16  | 1   | >64 | >64 | >16 | 16   | >16 | >16 | >16 | 1     |
| <i>Microascus trigonosporus</i> var. <i>terreus</i>       | CBS 601.67 | soil                                           | >16 | >16 | 2   | >64 | >64 | >16 | 4    | >16 | >16 | >16 | 2     |
| <i>Microascus trigonosporus</i> var. <i>trigonosporus</i> | CBS 494.70 | marine sediment                                | -   | >16 | 1   | >64 | >64 | >16 | -    | >16 | >16 | >16 | 0.5   |
| <i>Scopulariopsis acremonium</i>                          | CBS 104.65 | soil                                           | 4   | 8   | 2   | >64 | >64 | >16 | 0.25 | 16  | >16 | 8   | 0.25  |
| <i>Scopulariopsis acremonium</i>                          | CBS 290.38 | skin infected with <i>Trichophyton</i> , horse | 8   | >16 | 0.5 | >64 | >64 | >16 | 0.5  | 4   | 1   | 2   | 0.125 |
| <i>Scopulariopsis acremonium</i>                          | CBS 620.70 | soil                                           | >16 | >16 | 2   | >64 | >64 | >16 | 0.5  | 16  | >16 | 8   | 0.25  |
| <i>Scopulariopsis asperula</i>                            | CBS 298.67 | <i>Triticum aestivum</i>                       | 2   | >16 | 1   | >64 | >64 | >16 | 8    | >16 | >16 | >16 | 1     |

|                                   |            |                                        |     |     |     |     |     |     |    |     |     |     |      |
|-----------------------------------|------------|----------------------------------------|-----|-----|-----|-----|-----|-----|----|-----|-----|-----|------|
| <i>Scopulariopsis asperula</i>    | CBS 390.52 | proboscis, <i>Calliphora vomitaria</i> | 4   | >16 | 1   | >64 | >64 | >16 | 8  | >16 | >16 | >16 | 2    |
| <i>Scopulariopsis asperula</i>    | CBS 853.68 | compost soil                           | 8   | >16 | 1   | >64 | >64 | >16 | 8  | >16 | >16 | 16  | 1    |
| <i>Scopulariopsis brevicaulis</i> | CBS 119550 | blood culture, child                   | >16 | >16 | 0.5 | >64 | >64 | >16 | 8  | >16 | >16 | >16 | 16   |
| <i>Scopulariopsis brevicaulis</i> | CBS 118474 | tattoo paint                           | >16 | >16 | 2   | >64 | >64 | >16 | 16 | >16 | >16 | >16 | 16   |
| <i>Scopulariopsis brevicaulis</i> | CBS 340.39 | bone                                   | 16  | >16 | 0.5 | >64 | >64 | >16 | 4  | >16 | >16 | >16 | 16   |
| <i>Scopulariopsis brevicaulis</i> | CBS 108960 | cheese                                 | >16 | >16 | 4   | >64 | >64 | >16 | 8  | >16 | >16 | >16 | 0.5  |
| <i>Scopulariopsis brevicaulis</i> | CBS 119549 | skin biopsy, child                     | >16 | >16 | 2   | >64 | >64 | >16 | 8  | >16 | >16 | >16 | 0.25 |
| <i>Scopulariopsis brevicaulis</i> | CBS 147.41 | nail, man                              | 8   | >16 | 0.5 | >64 | >64 | >16 | 4  | >16 | >16 | >16 | 16   |
| <i>Scopulariopsis brevicaulis</i> | CBS 398.54 | toe nail, man                          | 16  | >16 | 1   | >64 | >64 | >16 | 16 | >16 | >16 | >16 | 16   |
| <i>Scopulariopsis brevicaulis</i> | CBS 112377 | indoor environment                     | >16 | >16 | 1   | >64 | >64 | >16 | 8  | >16 | >16 | >16 | 0.5  |
| <i>Scopulariopsis</i>             | CBS        | hardwood                               | >16 | >16 | 4   | >64 | >64 | >16 | 8  | 8   | >16 | >16 | 8    |

|                                  |            |                                     |     |     |        |     |     |     |     |     |     |     |      |
|----------------------------------|------------|-------------------------------------|-----|-----|--------|-----|-----|-----|-----|-----|-----|-----|------|
| <i>brumptii</i>                  | 121662     | branch                              |     |     |        |     |     |     |     |     |     |     |      |
| <i>Scopulariopsis brumptii</i>   | CBS 116060 | antique tapestries                  | >16 | >16 | 0.5    | >64 | >64 | >16 | 8   | >16 | >16 | 16  | 8    |
| <i>Scopulariopsis brumptii</i>   | CBS 896.68 | soil                                | -   | 4   | 0.0313 | >64 | >64 | >16 | -   | 16  | >16 | 4   | 0.25 |
| <i>Scopulariopsis brumptii</i>   | CBS 345.58 | skin and hair, man                  | >16 | -   | 0.0313 | >64 | >64 | >16 | 16  | >16 | >16 | >16 | 1    |
| <i>Scopulariopsis canadensis</i> | CBS 892.68 | soil                                | 8   | >16 | 0.5    | >64 | >64 | >16 | 0.5 | 8   | >16 | 8   | 8    |
| <i>Scopulariopsis carbonaria</i> | CBS 253.69 | soil                                | 4   | >16 | 0.0313 | >64 | >64 | >16 | 0.5 | 8   | 1   | 1   | 0.25 |
| <i>Scopulariopsis carbonaria</i> | CBS 205.61 | soil                                | >16 | >16 | 4      | >64 | >64 | >16 | 4   | >16 | >16 | >16 | -    |
| <i>Scopulariopsis carbonaria</i> | CBS 855.68 | soil                                | 16  | >16 | 8      | >64 | >64 | >16 | 8   | >16 | >16 | >16 | 8    |
| <i>Scopulariopsis chartarum</i>  | CBS 670.74 | dead branches, <i>Picea excelsa</i> | >16 | >16 | 0.0625 | >64 | >64 | >16 | 8   | >16 | >16 | >16 | 0.5  |
| <i>Scopulariopsis chartarum</i>  | CBS 294.52 | mouldy wall-paper                   | >16 | >16 | 4      | >64 | >64 | >16 | 8   | 16  | >16 | >16 | 16   |
| <i>Scopulariopsis chartarum</i>  | CBS 897.68 | soil                                | >16 | >16 | 0.25   | >64 | >64 | >16 | 8   | >16 | >16 | 16  | 0.25 |

|                                  |               |                              |     |     |        |     |     |     |    |     |     |     |      |
|----------------------------------|---------------|------------------------------|-----|-----|--------|-----|-----|-----|----|-----|-----|-----|------|
| <i>Scopulariopsis coprophila</i> | CBS<br>433.83 | soil                         | 0.5 | 16  | 0.0313 | >64 | >64 | >16 | 4  | 4   | -   | 16  | 0.25 |
| <i>Scopulariopsis croci</i>      | CBS<br>158.44 | crocus                       | >16 | >16 | 1      | >64 | >64 | >16 | 2  | >16 | >16 | 16  | 8    |
| <i>Scopulariopsis flava</i>      | CBS<br>207.61 | cheese                       | 16  | >16 | 8      | >64 | >64 | >16 | 4  | >16 | >16 | >16 | 0.5  |
| <i>Scopulariopsis flava</i>      | CBS<br>119.43 | soil                         | >16 | >16 | 1      | >64 | >64 | >16 | 8  | >16 | >16 | >16 | 1    |
| <i>Scopulariopsis flava</i>      | CBS<br>334.35 | pupa, <i>Arge berberidis</i> | >16 | >16 | 2      | >64 | >64 | >16 | 1  | >16 | >16 | 16  | 0.25 |
| <i>Scopulariopsis fusca</i>      | CBS<br>117767 | wood sample                  | 2   | >16 | 2      | >64 | >64 | >16 | 16 | >16 | >16 | >16 | 0.5  |
| <i>Scopulariopsis fusca</i>      | CBS<br>401.34 | carcass, rabbit              | 8   | >16 | 2      | >64 | >64 | >16 | 16 | >16 | >16 | >16 | 1    |
| <i>Scopulariopsis fusca</i>      | CBS<br>334.53 | nail, man                    | 8   | >16 | 1      | >64 | >64 | >16 | 16 | >16 | >16 | >16 | 0.5  |
| <i>Scopulariopsis gracilis</i>   | CBS<br>752.97 | cashew nuts                  | >16 | >16 | 1      | >64 | >64 | >16 | 8  | >16 | >16 | >16 | 0.5  |
| <i>Scopulariopsis gracilis</i>   | CBS<br>369.70 | food                         | >16 | >16 | 1      | >64 | >64 | >16 | 16 | >16 | >16 | >16 | 8    |
| <i>Scopulariopsis humicola</i>   | CBS<br>487.66 | soil                         | >16 | >16 | 0.5    | >64 | >64 | >16 | 2  | >16 | >16 | 8   | 16   |

|                                |             |                           |      |     |        |     |     |      |       |      |        |     |       |
|--------------------------------|-------------|---------------------------|------|-----|--------|-----|-----|------|-------|------|--------|-----|-------|
| <i>Scopulariopsis humicola</i> | CBS 123019  | soil                      | 8    | >16 | 1      | >64 | >64 | >16  | 2     | 8    | >16    | 8   | 2     |
| <i>Scopulariopsis humicola</i> | CBS 578.66* | leaf litter               | >16  | 2   | 1      | >64 | >64 | >16  | 4     | >16  | >16    | >16 | -     |
|                                |             |                           | >16  | >16 | 1      | >64 | >64 | >16  | 4     | >16  | >16    | 16  | 0.5   |
| <i>Scopulariopsis koningii</i> | CBS 152.22  | not specified             | 16   | >16 | 1      | >64 | >64 | >16  | 2     | >16  | >16    | >16 | 2     |
| <i>Scopulariopsis koningii</i> | CBS 289.38  | man                       | 4    | >16 | 8      | >64 | >64 | >16  | 16    | >16  | >16    | >16 | 0.5   |
| <i>Scopulariopsis koningii</i> | CBS 208.61  | elephant                  | >16  | >16 | 1      | >64 | >64 | >16  | 4     | >16  | >16    | >16 | 16    |
| <i>Scopulariopsis murina</i>   | CBS 830.70  | composted municipal waste | >16  | >16 | 1      | >64 | >64 | >16  | 4     | >16  | >16    | >16 | 16    |
| <i>Scopulariopsis murina</i>   | CBS 621.70  | composted municipal waste | >16  | >16 | 1      | >64 | >64 | >16  | 2     | >16  | >16    | >16 | 1     |
| <i>Scopulariopsis parva</i>    | CBS 209.61  | soil                      | 4    | >16 | 0.0313 | >64 | >64 | >16  | 2     | 16   | 2      | 16  | 8     |
| <i>Scopulariopsis parva</i>    | CBS 271.76  | soil                      | 0.25 | >16 | -      | >64 | >64 | 0.25 | 0.125 | 0.25 | 0.0313 | 1   | 0.125 |

|                                       |   |     |          |     |     |          |     |   |              |   |       |
|---------------------------------------|---|-----|----------|-----|-----|----------|-----|---|--------------|---|-------|
| <i>Aspergillus flavus</i> ATCC 204304 | 4 | >16 | 0.25-0.5 | >64 | >64 | 0.25-0.5 | 1-2 | 4 | 0.0625-0.125 | 1 | 0.125 |
| MIC/MEC range                         |   |     |          |     |     |          |     |   |              |   |       |

\* For *Scopulariopsis humicola* strain CBS 578.66, drug susceptibility testing was performed for two separate cultures.

**MIC:** minimal inhibitory concentration; **MEC:** minimal effective concentration; **CBS:** Centraalbureau voor Schimmelcultures; **AMB:** amphotericin B; **CPX:** ciclopirox; **TRB:** terbinafine; **5FC:** 5-fluorocytosine; **FLC:** fluconazole; **ITC:** itraconazole; **KTC:** ketoconazole; **MCZ:** miconazole; **POS:** posaconazole; **VRC:** voriconazole; **CFG:** caspofungin
